# Supplementary material
Source: publisher figshare collection journal article supplement (https://gsajournals.figshare.com/ndownloader/files/31138492)
Supplement: Supplementary file 1 [file 31138492]

Supplementary Table 5. Strains used in this work

| **Strain** | **Genotype** | **Reference** |
| --- | --- | --- |
| CEA17 | *akuB* (KU80)Δ, MAT1-1 | Da Silva Ferreira et al., 2006 |
| Af293 | Wild-type, MAT1-2 | ASPGD |
| Δ*crzA*Af293 | Δ*crzA*::*pyrG*; *pyrG*1, MAT1-2 | Ries et al., 2017 |
| Δ*crzA*CEA17 | Δ*crzA*::*pyrG*, *akuB* (KU80)Δ, MAT1-1 | Soriani et al., 2008 |
| *crzA*:GFP | *crzA*::GFP::*pyrG*, *akuB* (KU80)Δ, MAT1-1 | Ries et al., 2017 |
| *∆fapR* | *ΔakuB::A.f.pyrG;pyrG1;ΔAfuB_086150::A.p.pyrG* | Wiermann et al., 2013 |
| *∆fmaA* | *ΔakuB::A.f.pyrG;pyrG1;ΔAfuB_086050::A.p.pyrG* | Wiermann et al., 2013 |
| *∆hasA* | *ΔnkuB, pyrG1,∆hasA::AppyrG* | Wiermann et al., 2014 |
| *hasAOE*CEA17 | *A.ppyrG::gpdA(p)::hasA,∆nkuB, pyrG1* | Wiermann et al., 2014 |
| *hasAOE*Af293 | *A.ppyrG::gpdA(p)::hasA,∆nkuB, pyrG1* | Wiermann et al., 2014 |
